# Supplementary material for: A highly immunogenic vaccine platform against encapsulated pathogens using chimeric probiotic Escherichia coli membrane vesicles
Source: PubMed Central journal article supplement (PMC9701205; doi:10.1038/s41541-022-00572-z), 2022-11-26

## Lipid A-core

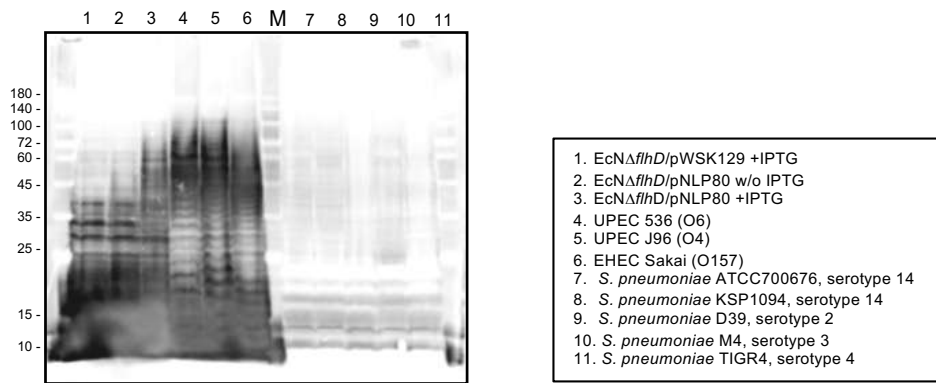

Supplementary Figure 1. Nakao et al.

### CPS14

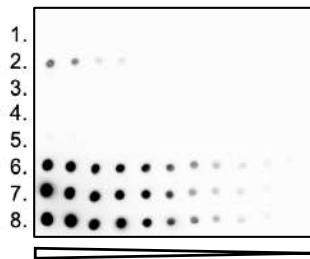

1. EcN $\Delta$ flhD/pWSK129 +IPTG 0.01mM
2. EcN $\Delta$ flhD/pNLP80 +IPTG 0.01mM
3. UPEC 536 (O6)
4. UPEC J96 (O4)
5. EHEC Sakai (O157)
6. *S. pneumoniae* ATCC 700676 (CPS14)
7. CPS14 standard-1
8. CPS14 standard-2

### O6

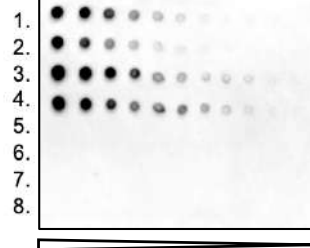

1. EcN $\Delta$ flhD/pWSK129 +IPTG 0.01mM
2. EcN $\Delta$ flhD/pNLP80 +IPTG 0.01mM
3. *E. coli* O6 reference strain (O6)
4. UPEC strain 536 (O6)
5. UPEC strain J96 (O4)
6. EHEC strain Sakai (O157)
7. *S. pneumoniae* ATCC 700676 (serotype 14)
8. *S. pneumoniae* KSP1094 (serotype 14)

Supplementary Figure 2. Nakao et al.

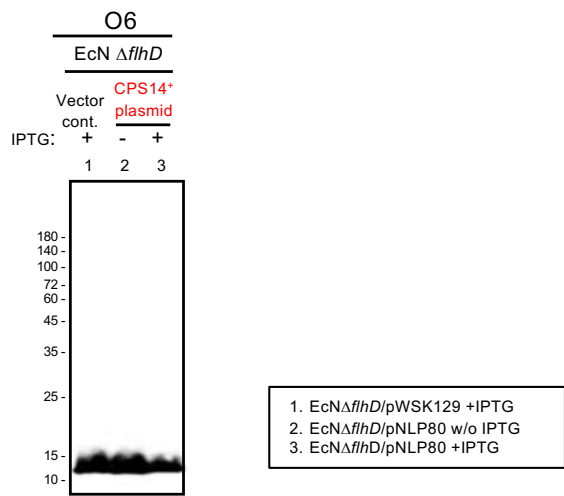

Supplementary Figure 3. Nakao et al.

MVs  
(vector control) 

CPS14<sup>+</sup>MVs 

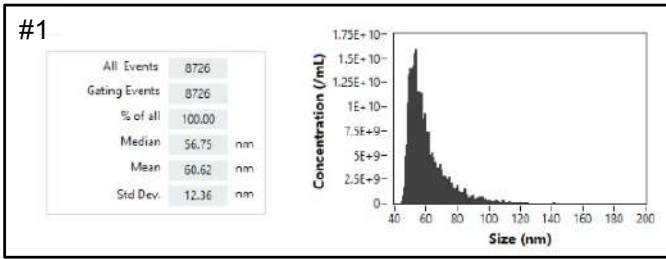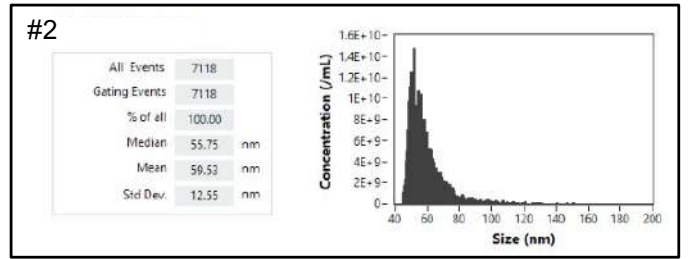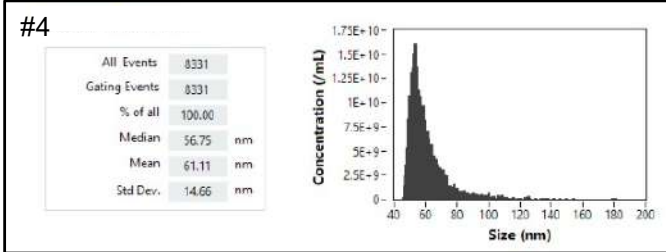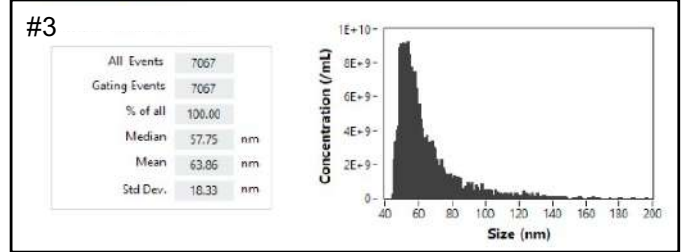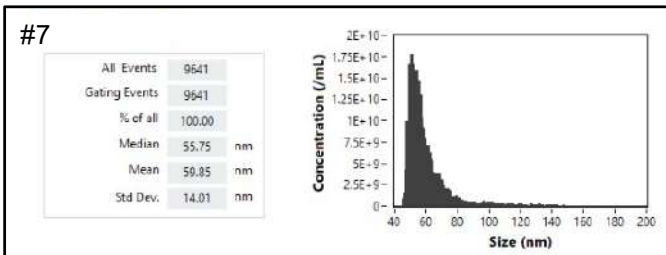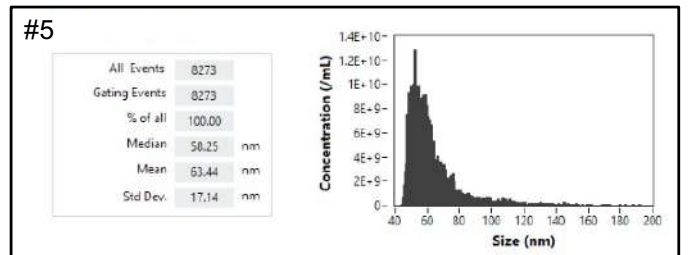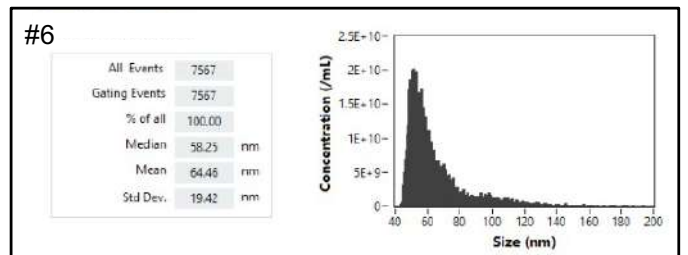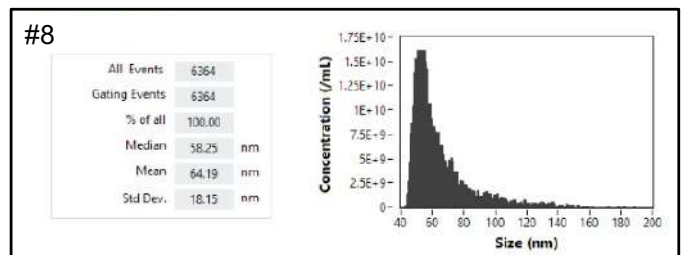

Supplementary Figure 4. Nakao et al.

MVs  
(vector control) 

Lot-1

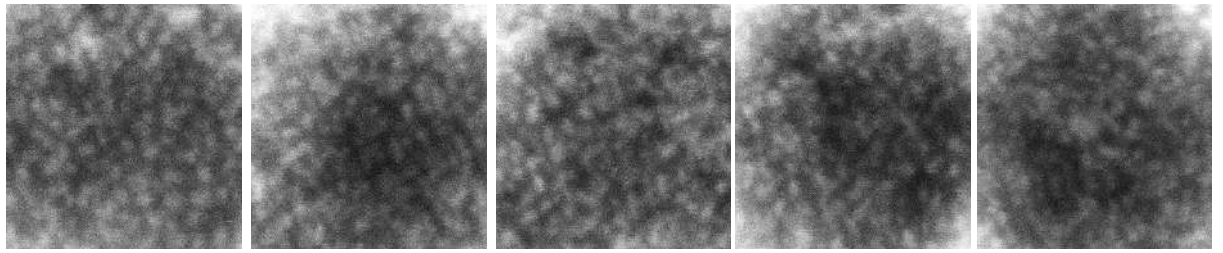

Lot-2

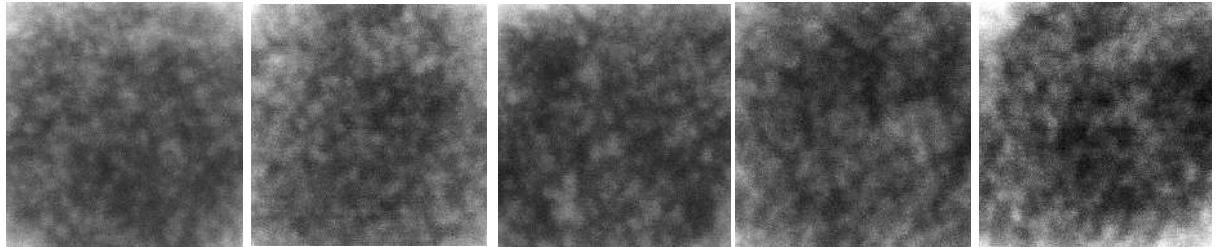

Lot-3

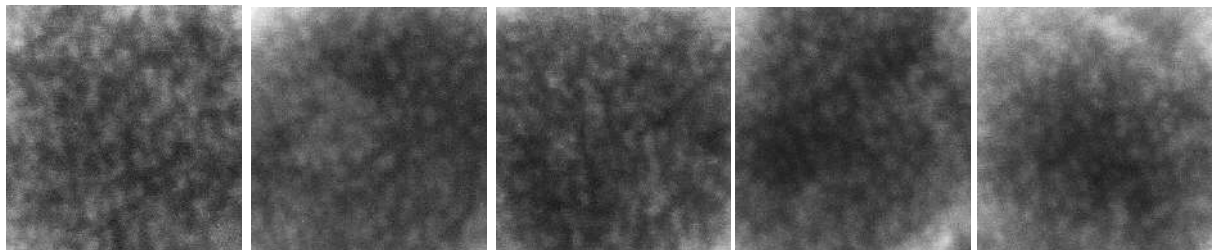

CPS14+MVs 

Lot-1

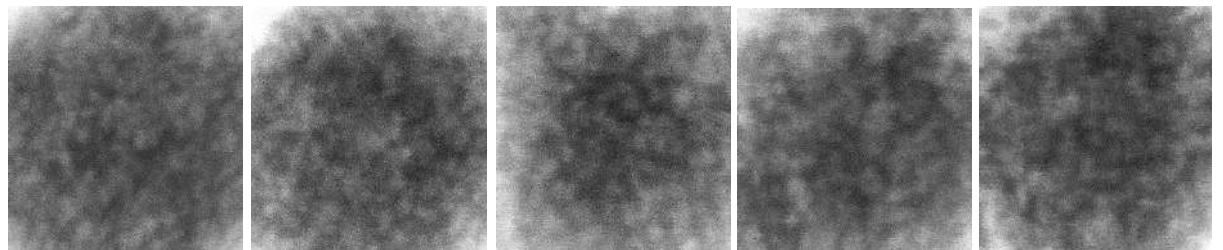

Lot-2

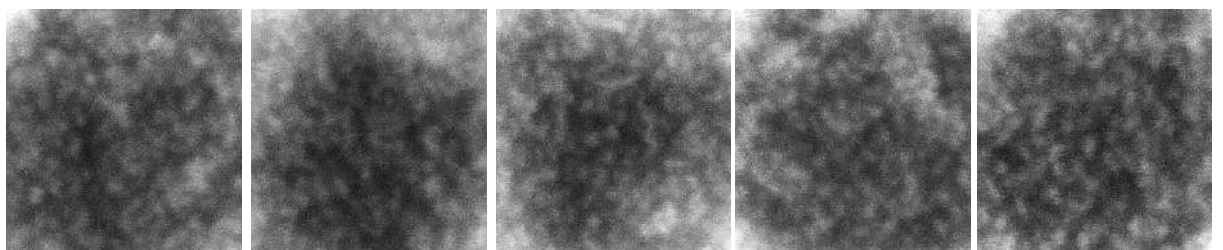

Lot-3

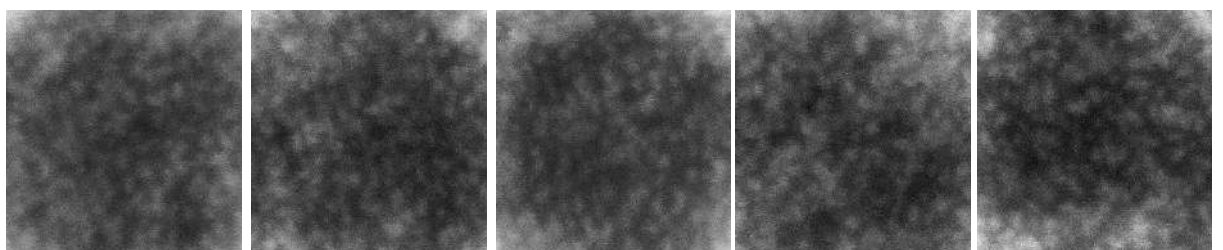

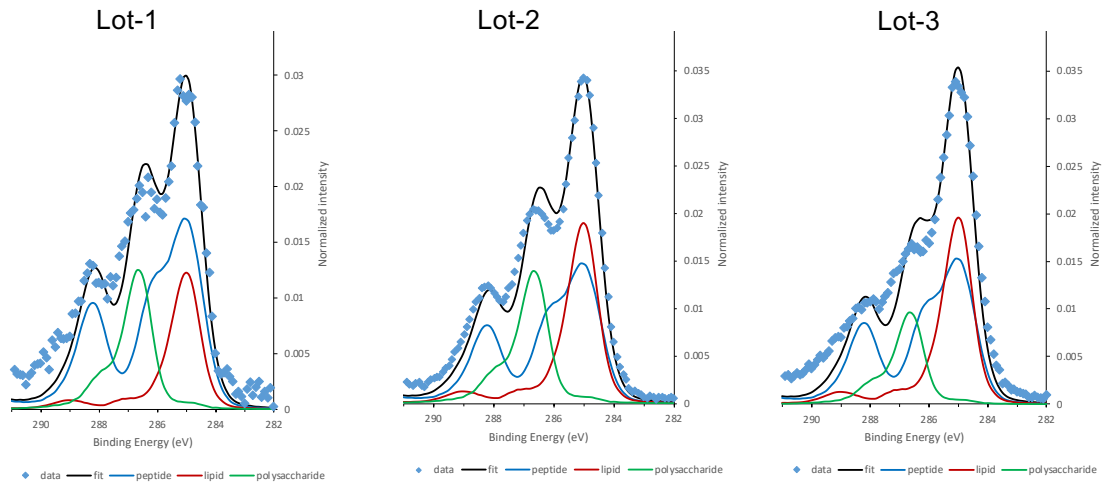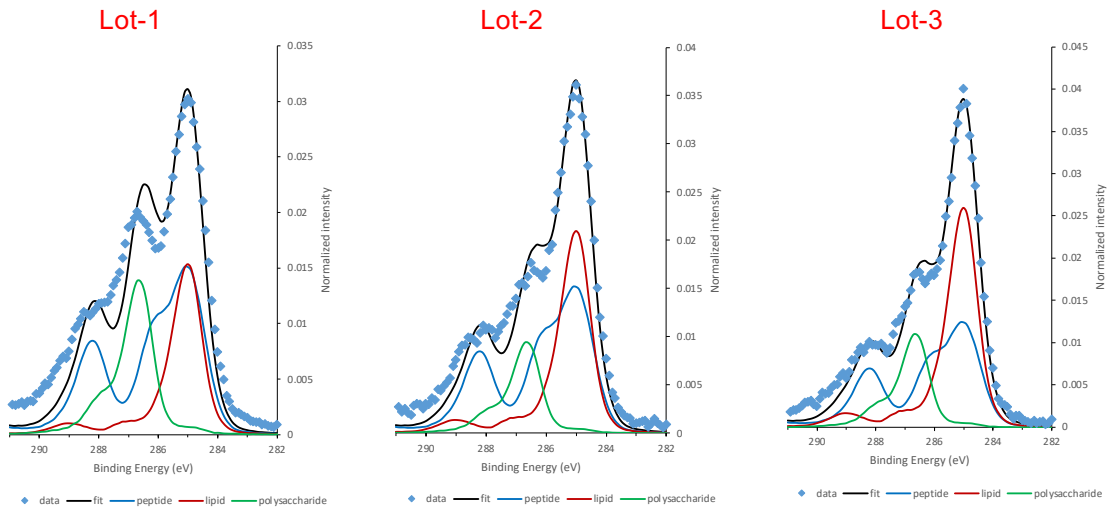

Supplementary Figure 6. Nakao et al.

## (A) Timeline of immunization, different doses of vaccines

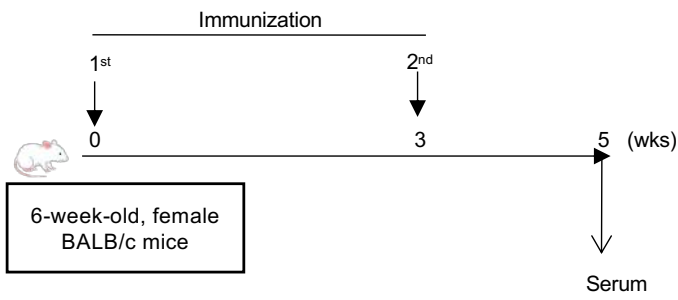

**PPSV23\_PBS** and 3 different doses, 90  $\mu$ L/shot  
Mice (n=2) were administered with PBS, 1/9 diluted [containing 0.5  $\mu$ g CPS14], 1/3 diluted [1.5  $\mu$ g], and undiluted PPSV23 [4.5  $\mu$ g].

**PCV13\_PBS** and 3 different doses, 90  $\mu$ L/shot  
Mice (n=2) were administered with PBS, 1/9 diluted [containing 0.043  $\mu$ g CPS14], 1/3 diluted [0.13  $\mu$ g], and undiluted PCV13 [0.39  $\mu$ g].

**CPS14<sup>+</sup>MVs\_PBS** and 3 different doses, 90  $\mu$ L/shot  
Mice (n=2) were administered with PBS, 1/9 diluted [containing 0.0014  $\mu$ g CPS14], 1/3 diluted [0.0044  $\mu$ g], and undiluted CPS14<sup>+</sup>MVs [0.013  $\mu$ g].

## (B) Humoral immune responses in serum after vaccination with different doses

### PPSV23

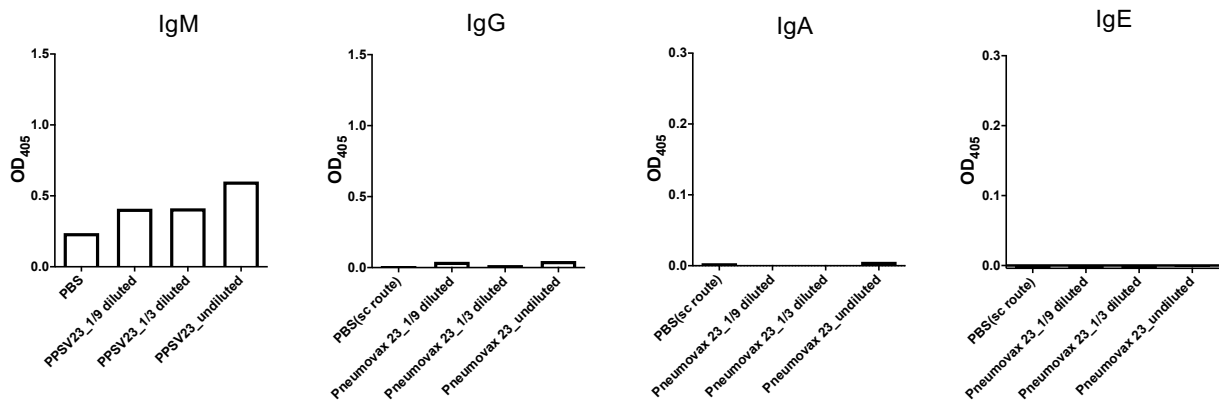

### PCV13

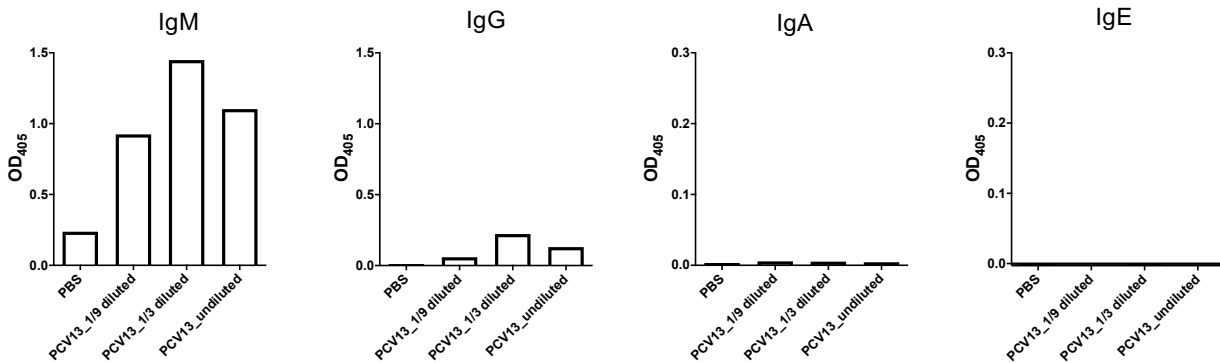

### CPS14<sup>+</sup> MVs

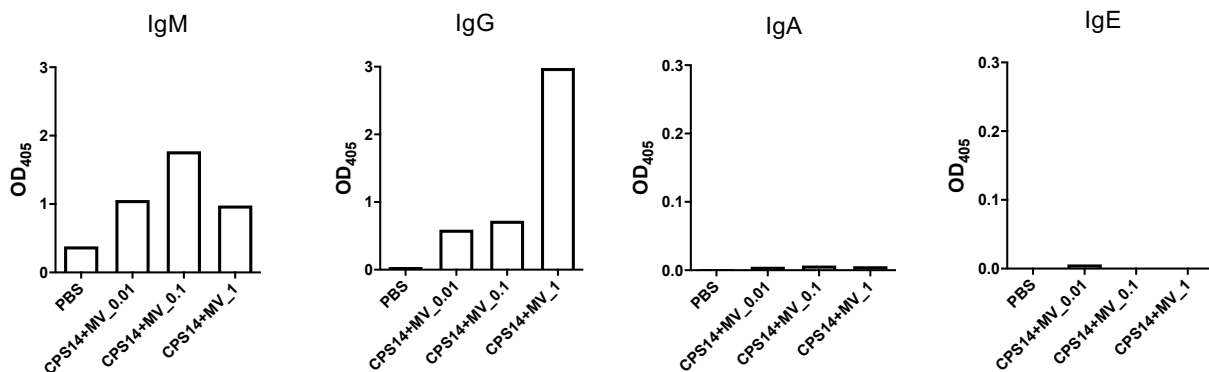

(C) Vaccination with PPSV23, PCV13, and CPS14+MVs at same CPS14 doses

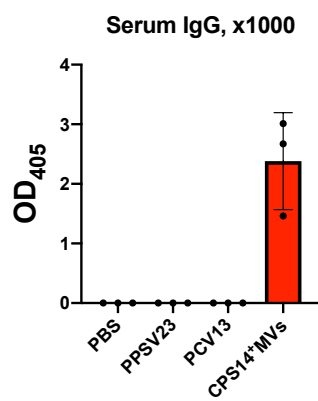

Supplementary Figure 7. Nakao et al.



### (A) SDS resistance

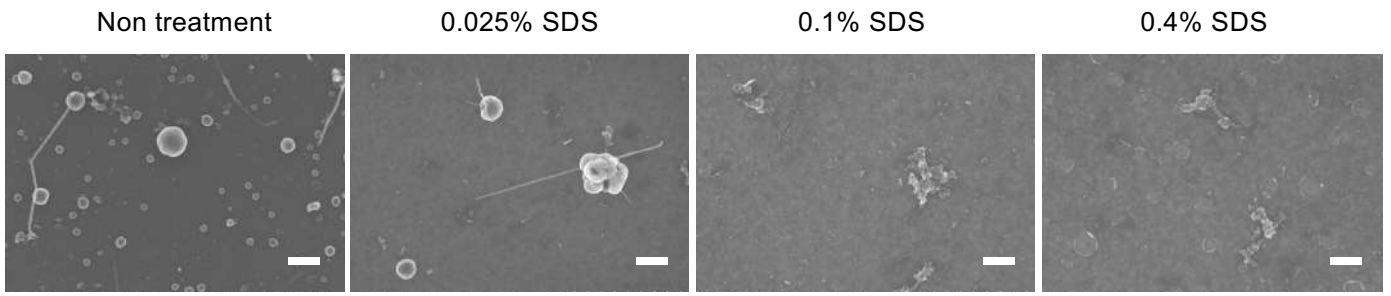

### (B) Timeline of immunization, using CPS14+MV<sub>s</sub> treated with formalin or detergent

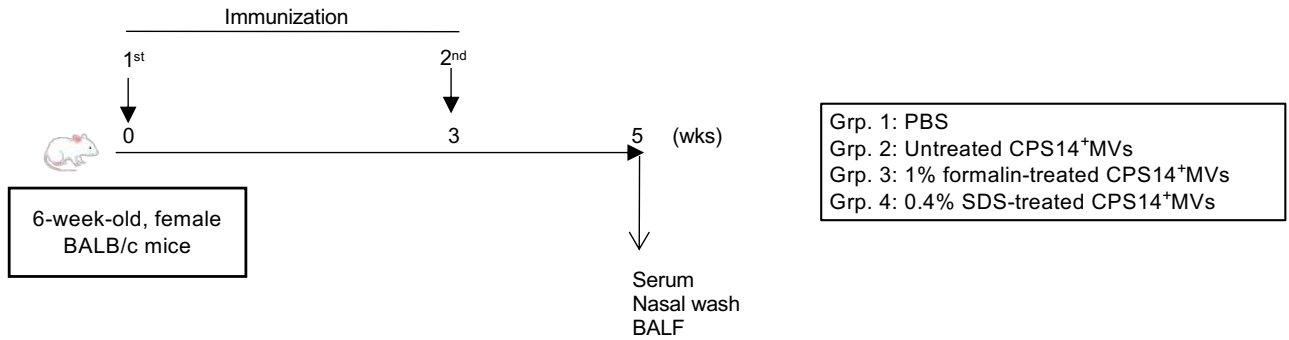

### (C) Humoral immune responses against CPS14: treatment with formalin or SDS

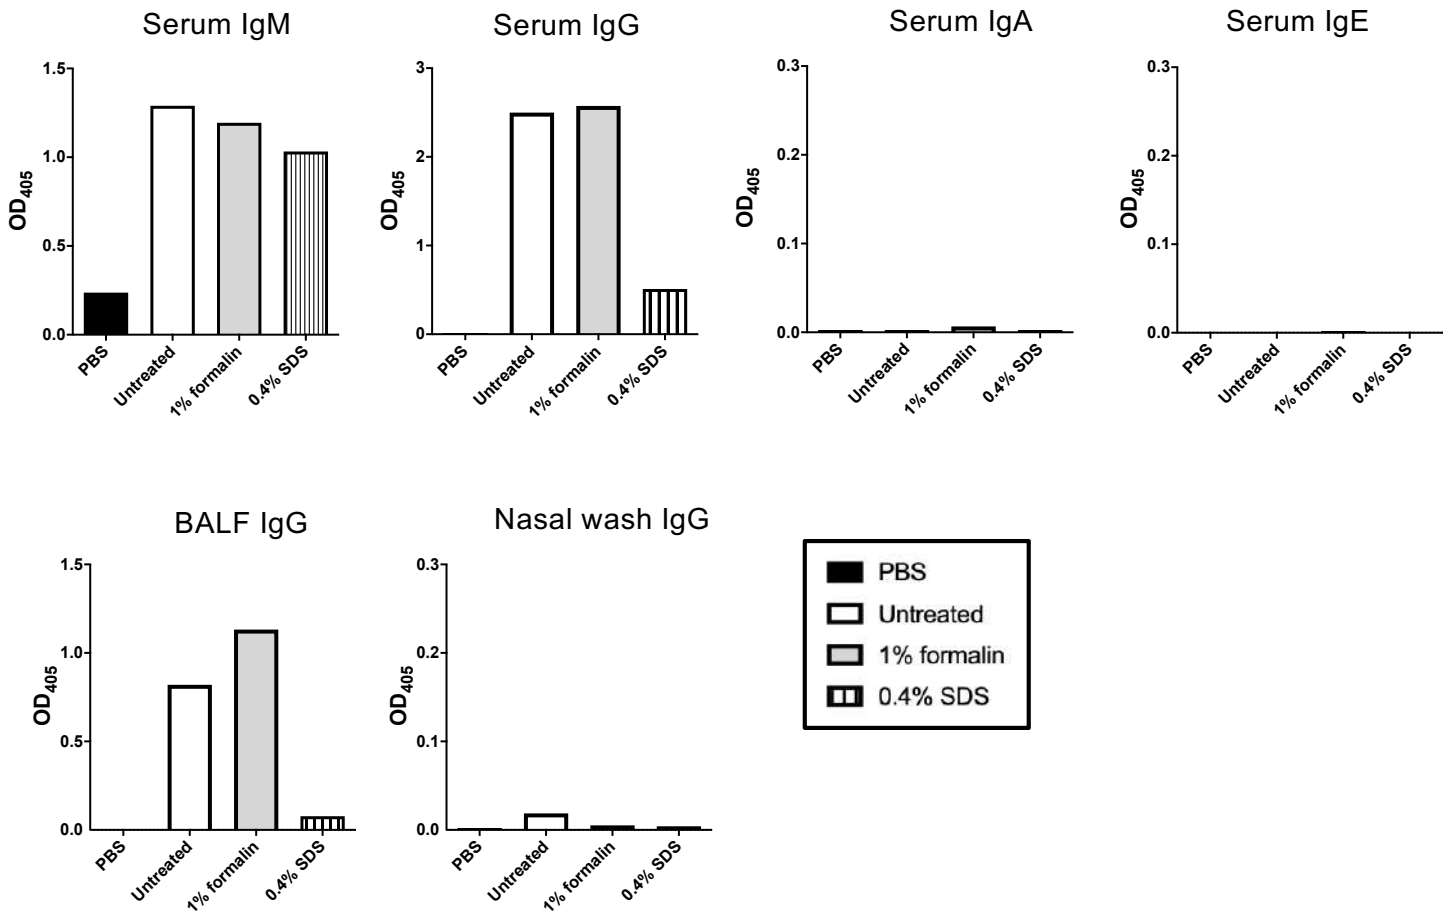

(D) Timeline of immunization, using CPS14<sup>+</sup>MVs with or without heat treatment

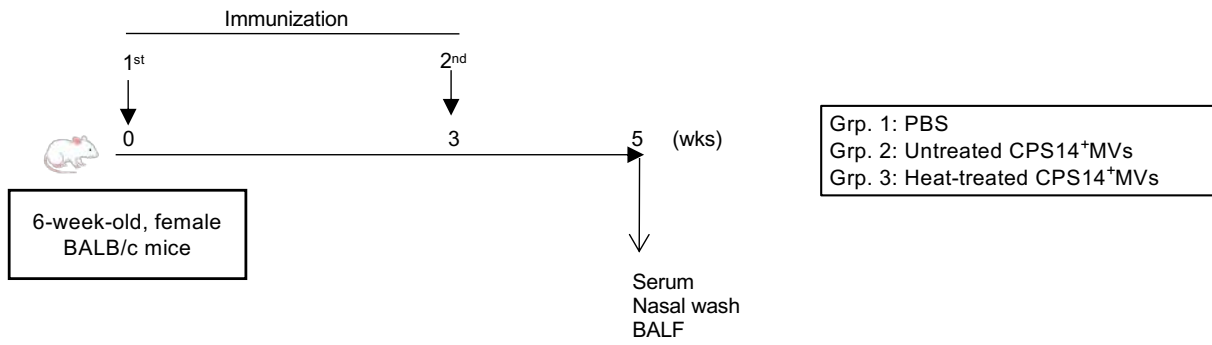

(E) Humoral immune responses against CPS14: Heat treatment

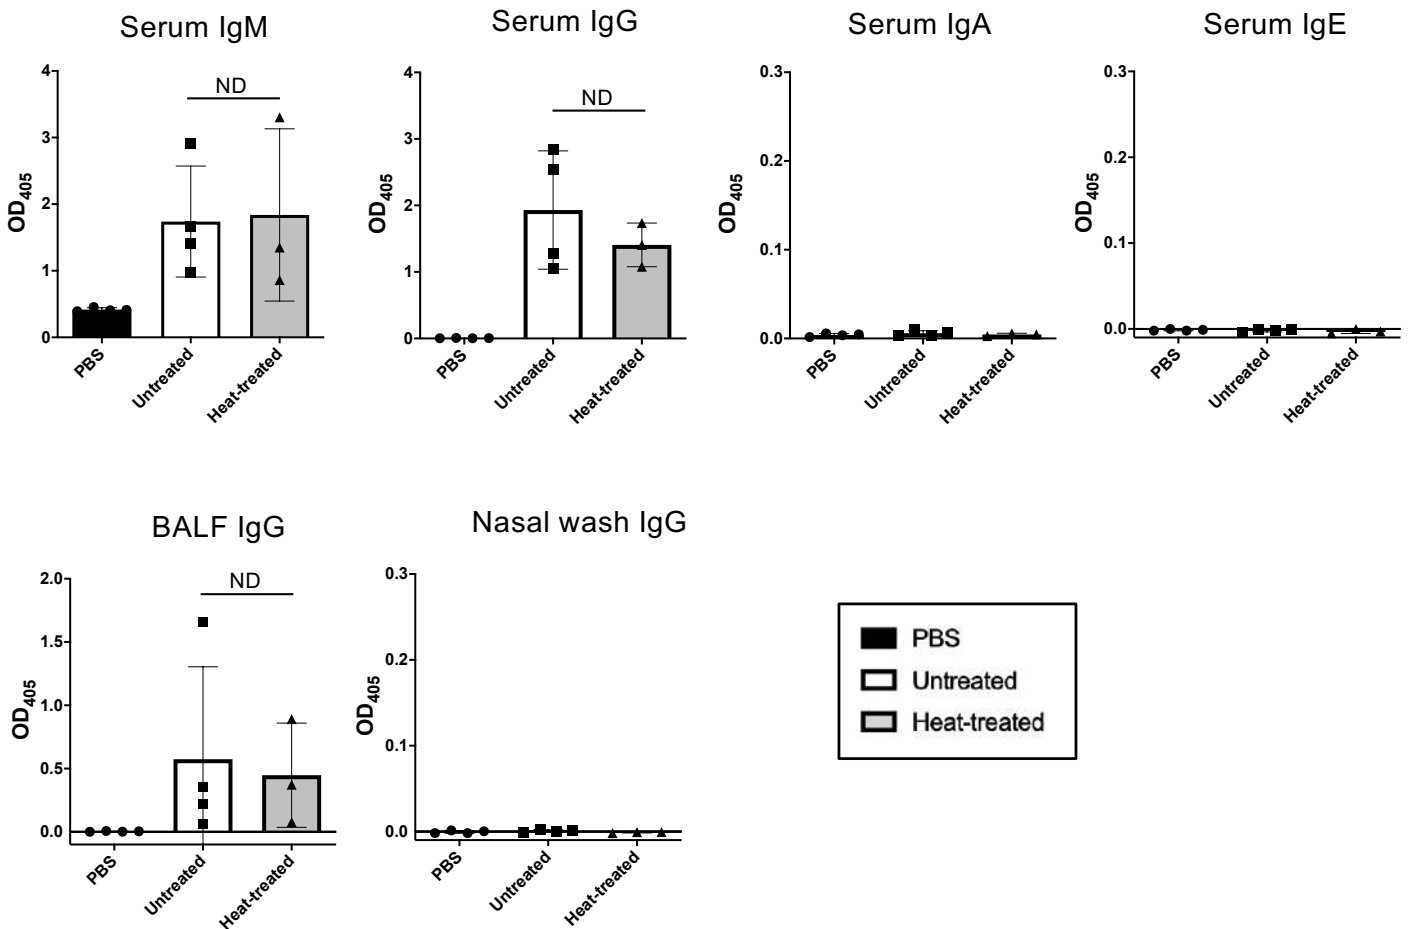

Supplementary Figure 8. Nakao et al.

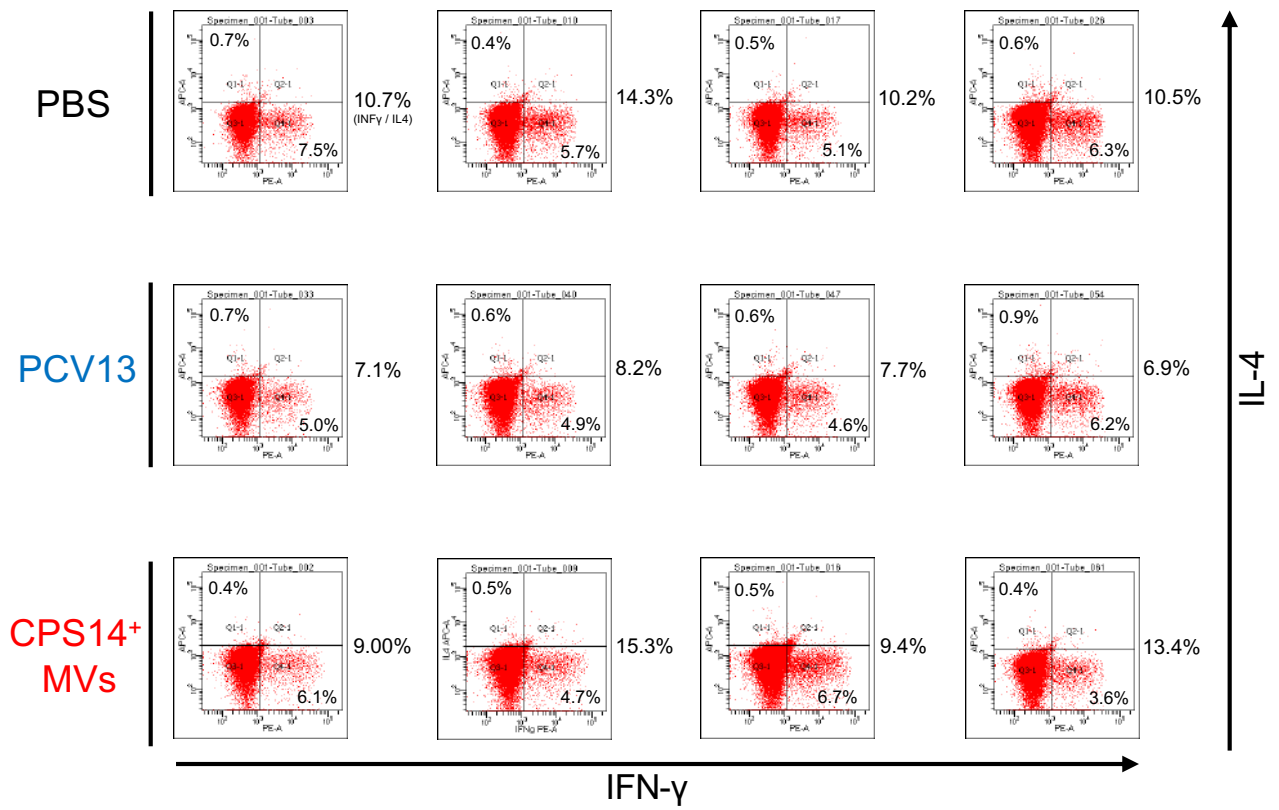

Supplementary Figure 9. Nakao et al.

(A) Secondary electron images

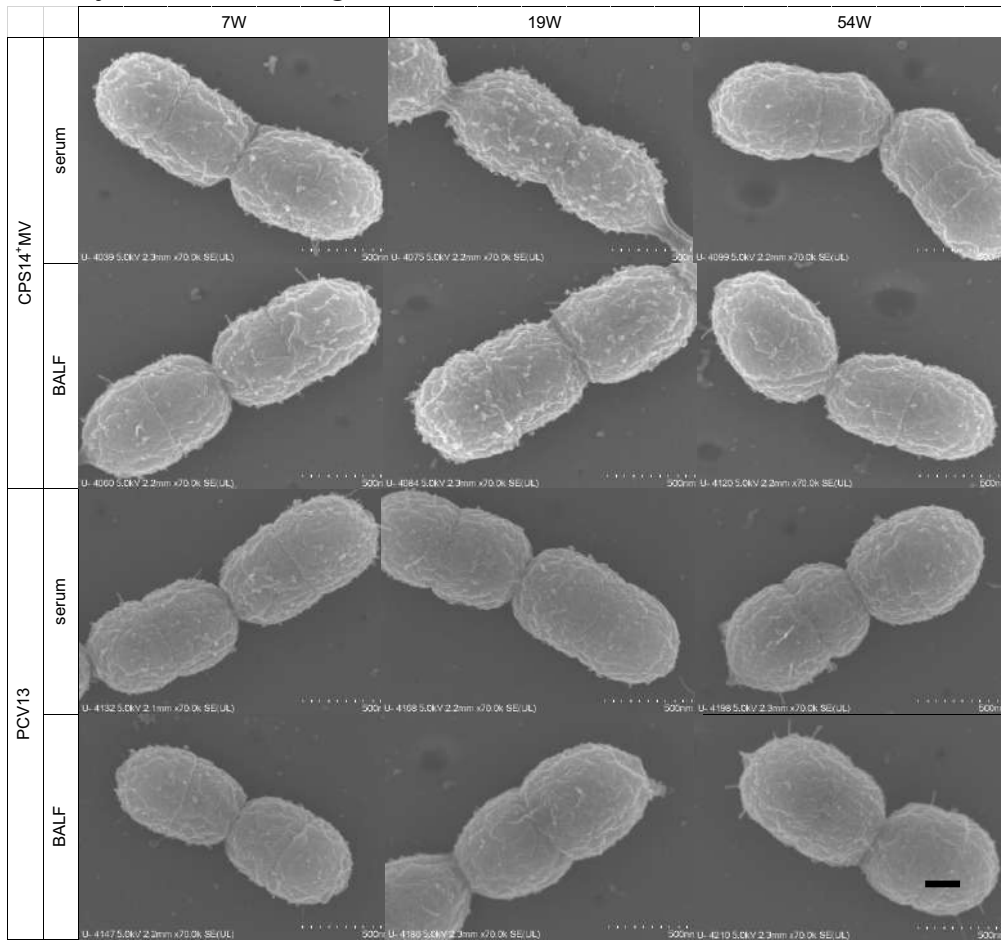

(B) Refractory electron images

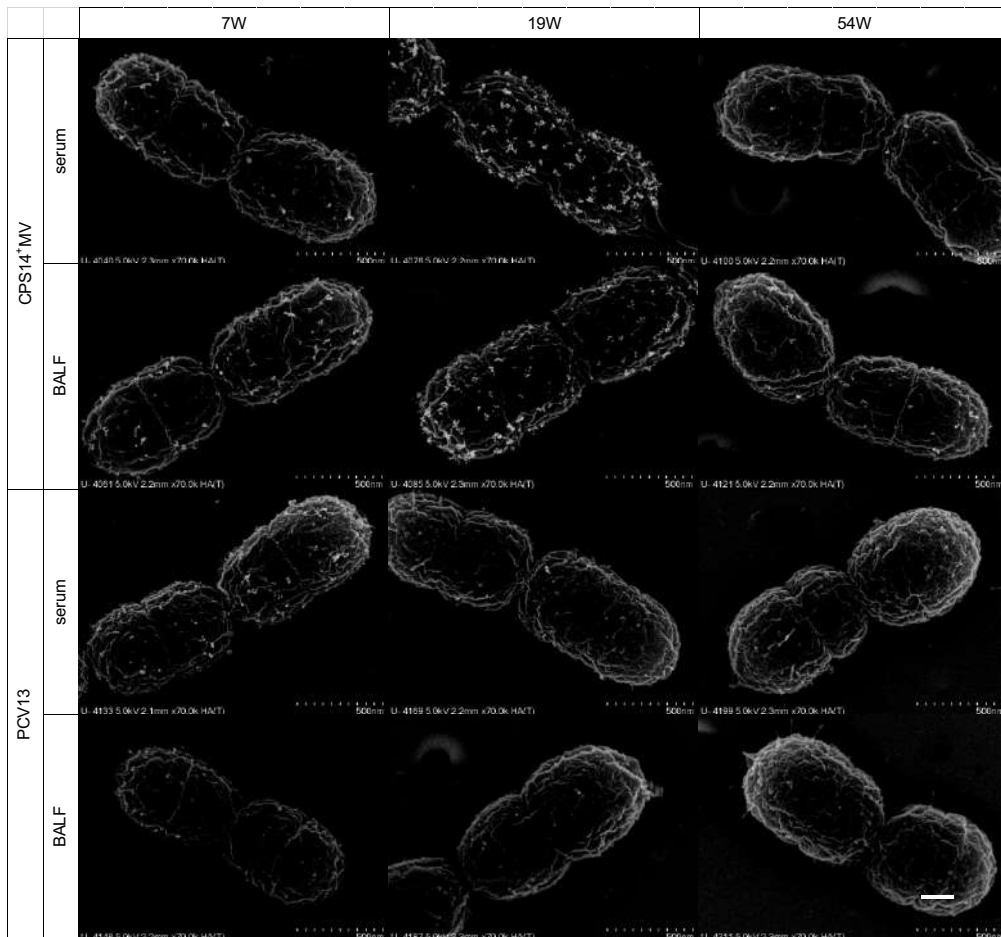

Supplement: 41541_2022_572_MOESM1_ESM.pdf [file 41541_2022_572_MOESM1_ESM.pdf]
